# Supplementary material for: Distribution of oral microbial flora among the students of a tertiary institution in Nigeria: A descriptive cross-sectional study
Source: Research Square preprint supplement (doi:10.21203/rs.3.rs-8711724/v1), 2026-02-23
Supplement: Supplementary file 1 [file 55089295212a4f84677d2ae7.docx]

**Supplementary table 1: Oral Hygiene Practices of Respondents**

| **Variable** | **Category** | **Frequency (n)** | **Percentage (%)** |
| --- | --- | --- | --- |
| Do you brush your teeth? | Yes | 302 | 100.0% |
|  | No | 0 | 0.0% |
| Brushing Time | Morning only before meal | 112 | 37.8% |
|  | Morning and night | 151 | 51.0% |
|  | Night only | 21 | 7.1% |
|  | Occasionally after sweets | 12 | 4.1% |
| Cleaning Method | Toothbrush | 282 | 93.4% |
|  | Chewing stick | 20 | 6.6% |
| Toothbrush Type | Hard | 34 | 12.1% |
|  | Medium | 183 | 64.9% |
|  | Soft | 65 | 23.0% |
| Fluoride Toothpaste Use | Yes | 242 | 80.1% |
|  | No | 28 | 9.3% |
|  | Not sure | 32 | 10.6% |
| Additional Oral Products Used | Mouthwash | 85 | 28.1% |
|  | Dental floss | 67 | 22.2% |
|  | Tongue scraper | 59 | 19.5% |
|  | Herbal remedies | 0 | 0.0% |
|  | None | 91 | 30.1% |
| Share oral hygiene tools? | Yes | 41 | 13.6% |
|  | No | 261 | 86.4% |
| Ever had professional cleaning? | Yes | 123 | 40.7% |
|  | No | 179 | 59.3% |
| Dental check-up frequency (n = 123) | Every 6 months | 25 | 20.3% |
|  | Once a year | 38 | 30.9% |
|  | Rarely | 43 | 35.0% |
|  | Never | 17 | 13.8% |
| How often do you consume sweets/chocolates? | Regularly (daily) | 29 | 9.6% |
|  | Occasionally (few times/week) | 174 | 57.6% |
|  | Rarely (few times/month) | 88 | 29.1% |
|  | Never | 11 | 3.6% |

**Supplementary table 2: Oral Health Status of Respondents**

| **Variable** | **Category** | **Frequency (n)** | **Percentage (%)** |
| --- | --- | --- | --- |
| Had or currently have any oral health problems? | Yes | 198 | 65.6% |
|  | No | 104 | 34.4% |
| Type of oral health condition(s), multiple responses allowed) | Tooth decay (cavities) | 157 | 52% |
|  | Gum bleeding/inflammation | 98 | 32% |
|  | Bad breath (halitosis) | 92 | 31% |
|  | Oral thrush | 44 | 15% |
|  | Recurrent mouth ulcers | 36 | 12% |
|  | Others (e.g. sensitivity) | 12 | 4% |
| Teeth ever removed? | Yes | 78 | 26% |
|  | No | 224 | 74% |
| If yes, how many times? (n = 78) | Once | 41 | 53% |
|  | Twice | 21 | 27% |
|  | More than twice | 16 | 21% |

**Supplementary Table 3: Logistic Regression Analysis of Predictors of Tooth Decay Among Respondents**

| **Predictor Variable** | **B (Regression Coefficient)** | **S.E.** | **Wald** | **p-value** | **Odds Ratio (Exp(B))** | **95% CI for OR** |
| --- | --- | --- | --- | --- | --- | --- |
| *Streptococcus mutans* (Present) | 1.185 | 0.312 | 14.43 | <0.001 | 3.27 | 1.77 – 6.05 |
| *Staphylococcus aureus* (Present) | 0.731 | 0.267 | 7.48 | 0.006 | 2.08 | 1.23 – 3.52 |
| *Staphylococcus spp.* (Present) | 0.702 | 0.331 | 4.5 | 0.034 | 2.02 | 1.06 – 3.86 |
| *Streptococcus sanguinis* (Present) | 0.667 | 0.307 | 4.72 | 0.03 | 1.95 | 1.06 – 3.58 |
| *Candida albicans* (Present) | 0.921 | 0.298 | 9.55 | 0.002 | 2.51 | 1.40 – 4.50 |
| *Candida* spp. (non-albicans) (Present) | 0.832 | 0.314 | 7.01 | 0.008 | 2.3 | 1.24 – 4.27 |
| *Klebsiella* spp. (Present) | 0.398 | 0.377 | 1.11 | 0.292 | 1.49 | 0.71 – 3.12 |
| *Escherichia coli* (Present) | 0.352 | 0.396 | 0.79 | 0.374 | 1.42 | 0.65 – 3.11 |
| *Proteus spp.* (Present) | 0.406 | 0.414 | 0.96 | 0.327 | 1.5 | 0.67 – 3.36 |
| Sweet Intake Frequency (1–4) | 0.647 | 0.152 | 18.03 | <0.001 | 1.91 | 1.42 – 2.58 |
| Gender (Female = 1) | 0.293 | 0.249 | 1.38 | 0.240 | 1.34 | 0.83 – 2.16 |
| Fluoride Toothpaste Use (Yes = 1) | -0.512 | 0.241 | 4.52 | 0.033 | 0.60 | 0.38 – 0.96 |
| Brushing Twice Daily (Yes = 1) | -0.378 | 0.218 | 3.00 | 0.083 | 0.69 | 0.46 – 1.04 |
